# Supplementary figures and images for: Strand-biased Gene Distribution in Bacteria Is Related to both Horizontal Gene Transfer and Strand-biased Nucleotide Composition
Source: PubMed Central journal article supplement — Genomics Proteomics Bioinformatics. 2012 Aug 8;10(4):186–96. doi: 10.1016/j.gpb.2012.08.001 (PMC5054707; doi:10.1016/j.gpb.2012.08.001), 2012-08-08

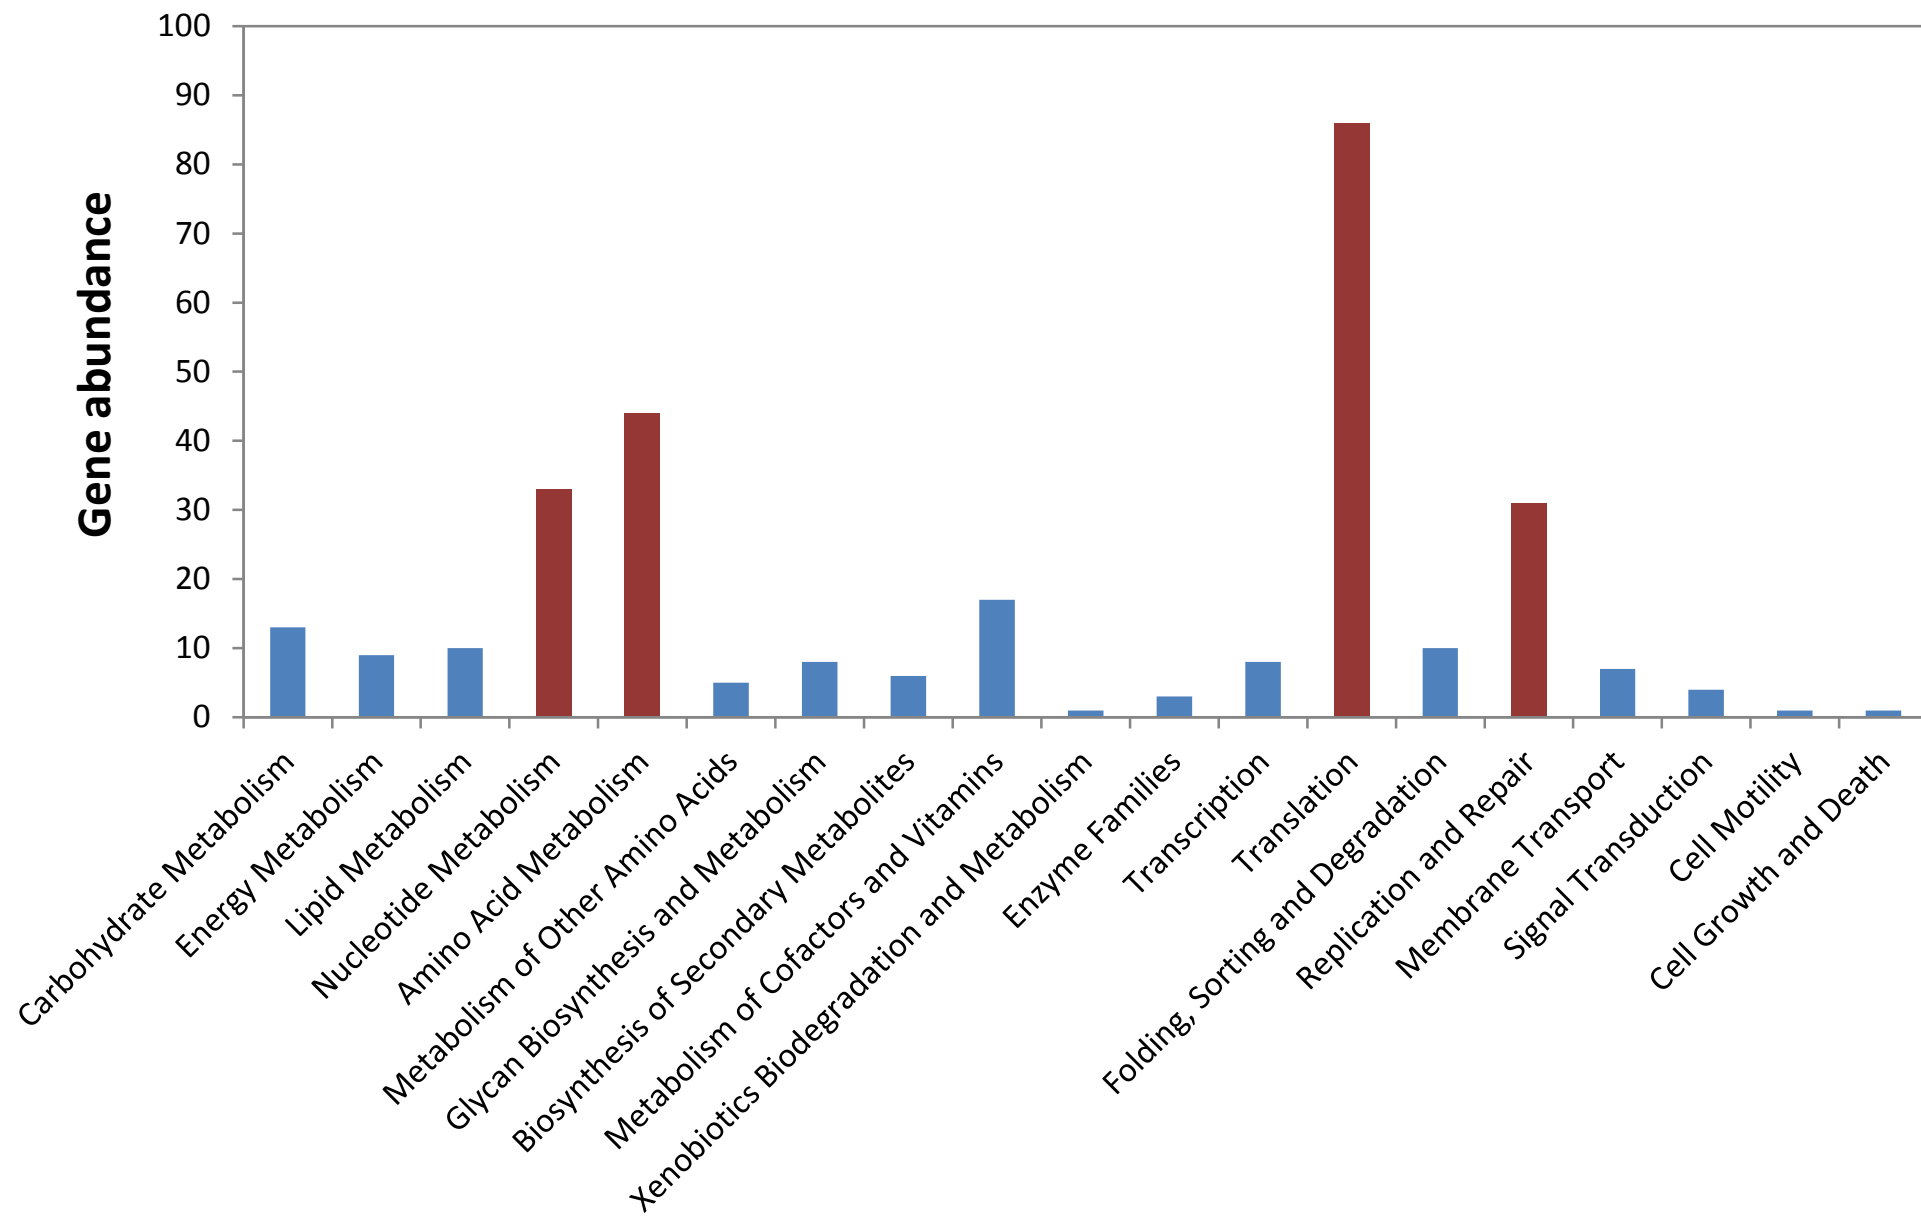

Supplement: mmc1.pdf [file mmc1.pdf]

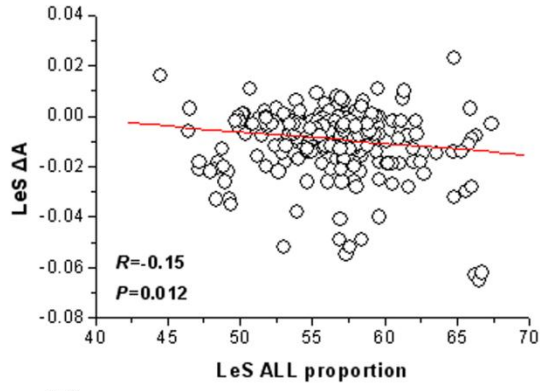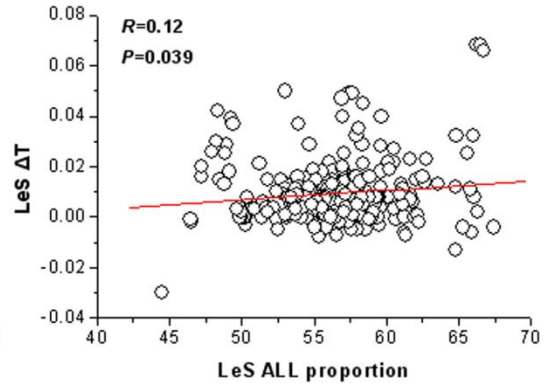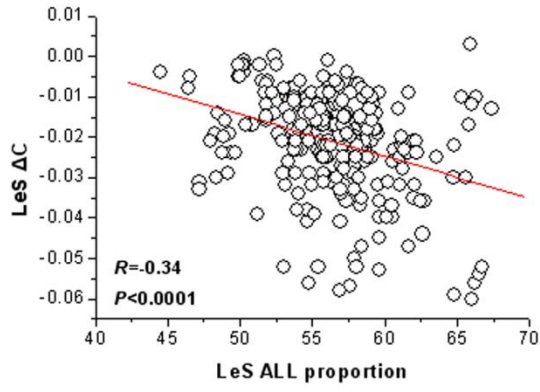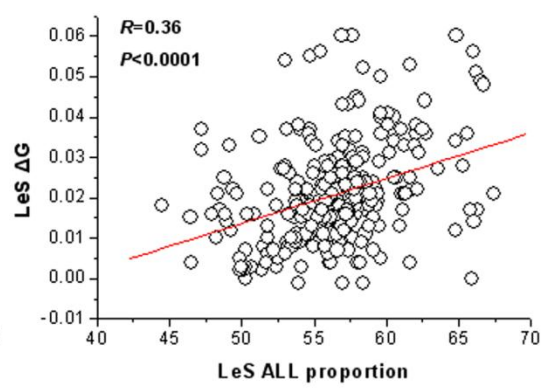

Supplement: mmc2.pdf [file mmc2.pdf]

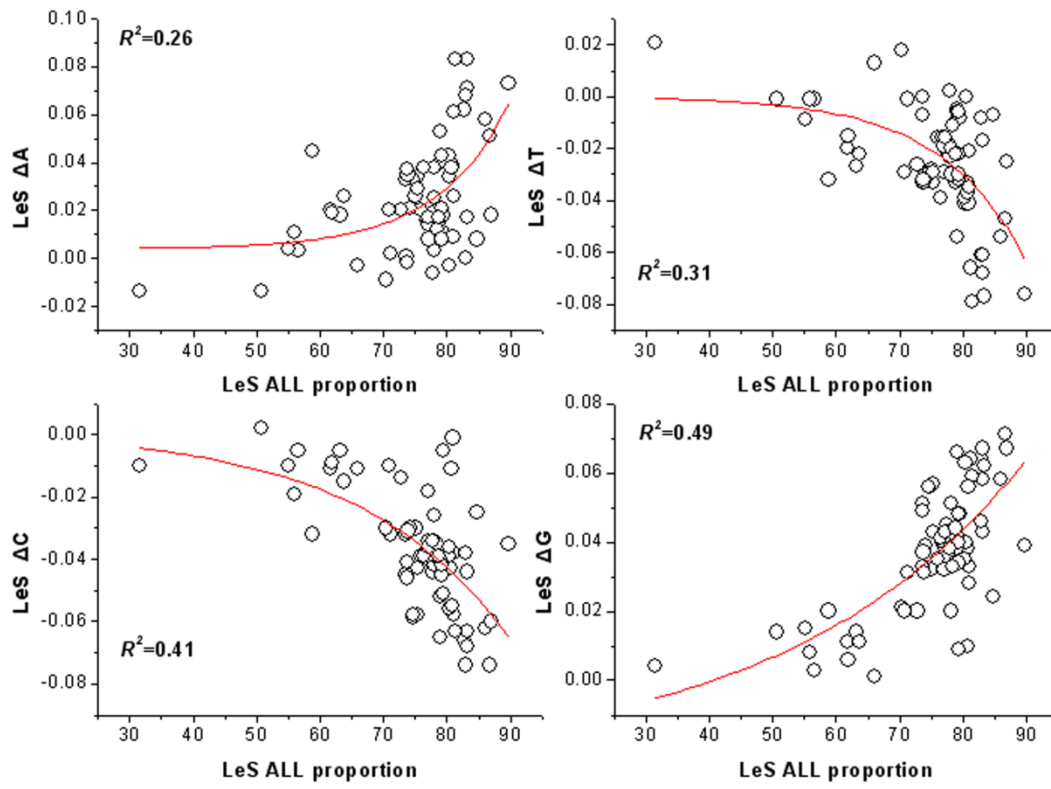

Supplement: mmc3.pdf [file mmc3.pdf]
